# Supplementary material for: Targeting BRCA1- and BRCA2-deficient cells with RAD52 small molecule inhibitors
Source: PubMed Central journal article supplement — Nucleic Acids Res. 2016 Feb 11;44(9):4189–99. doi: 10.1093/nar/gkw087 (PMC4872086; doi:10.1093/nar/gkw087), 2016-02-11
Supplement: supp_gkw087_nar-01572-d-2015-File003.pdf [file supp_gkw087_nar-01572-d-2015-File003.pdf]

## SUPPLEMENTARY MATERIAL

Targeting BRCA1- and BRCA2-deficient cells with RAD52 small molecule inhibitors

F. Huang<sup>1</sup>, N. Goyal<sup>1</sup>, K. Sullivan<sup>2</sup>, K. Hanamshet<sup>1</sup>, M. Patel<sup>1</sup>, O. M. Mazin<sup>1</sup>, Charles X. Wang<sup>1</sup>, W. Frank An<sup>3</sup>, J. Spoonamore<sup>3</sup>, Shailesh Metkar<sup>3</sup>, K. A. Emmitte<sup>4</sup>, S. Cocklin<sup>1</sup>, T. Skorski<sup>2</sup>, and A. V. Mazin<sup>1\*</sup>.

<sup>1</sup>*Department of Biochemistry and Molecular Biology, Drexel University College of Medicine, Philadelphia, PA 19102, USA;* <sup>2</sup>*Department of Microbiology and Immunology, and Fels Institute for Cancer Research and Molecular Biology, Temple University School of Medicine, Philadelphia, PA 10140, USA;* <sup>3</sup>*Broad Institute of Harvard and Massachusetts Institute of Technology, Cambridge, Massachusetts 02142;* <sup>4</sup>*Vanderbilt Specialized Chemistry Center for Accelerated Probe Development, Vanderbilt Center for Neuroscience Drug Discovery, Department of Pharmacology and Chemistry, Vanderbilt University, Nashville, TN 37232, USA*

\*Corresponding Author:

Alexander Mazin, Ph. D.

Drexel University College of Medicine

Department of Biochemistry and Molecular Biology

245 N 15<sup>th</sup> Street, MS 497, NCB, Room 10103

Philadelphia, PA 19102–1192

Tel: 215–762–7195; Fax: 215–762–4452

E-mail: [amazin@drexelmed.edu](mailto:amazin@drexelmed.edu)

### Content:

Supplementary Figures 1-6

Supplementary Tables 1-3

**Supplementary Figure 1.** Analysis of RAD51 and RAD52 proteins in a SDS-polyacrylamide gel. Proteins were stained with Coomassie blue. Lane M, Migration markers; Lane 1, Rad52; Lane 2, RAD51. 1 µg of each protein was loaded on a 12% SDS-polyacrylamide gel.

**Supplementary Figure 2.** The effect of D-I03 concentration on the initial rate of ssDNA annealing promoted by RAD52. The rates of RAD52-promoted ssDNA annealing were calculated based on the data in Fig. 1C. The data are the mean of 3 independent measurements; error bars represent the SD.

**Supplementary Figure 3.** Structures of RAD52 inhibitors.

**Supplementary Figure 4.** The effect of the RAD52 inhibitors on DNA pairing activity of RAD51 in the D-loop assay. To form RAD51 nucleoprotein filament, RAD51 (1 µM) was incubated with <sup>32</sup>P-labeled ssDNA (3 µM, nt) in buffer containing 25 mM Tris-Acetate, pH 7.5, 100 µg·ml<sup>-1</sup> BSA, 1 mM calcium chloride, 1 mM ATP and 2 mM DTT for 15 min at 37 °C. Then inhibitors were added at the concentrations that correspond to their 10 x IC<sub>50</sub> values for RAD52 pairing activity (see Figure 2C; Supplementary Table 2) and incubation continued for 15 min at 37 °C. D-loop formation was initiated by addition of supercoiled pUC19 DNA (50 µM, nucleotides) and was carried out 15 min at 37 °C. The reactions were stopped and the products processed as described in Materials and Methods. Error bars indicate SD.

**Supplementary Figure 5.** The effect of D-I03 on the repair of the I-SceI-induced DSBs in U2OS cells carrying the SSA-GFP reporter was determined by flow cytometry. Green fluorescence (GRN-Hlog) was plotted against red fluorescence (RED-Hlog) for the sample of 10,000 cells. The GFP+ population is denoted by the elliptical M1 marker. Cells with I-SceI-induced DSBs were treated with D-I03 at 0, 5, 10, 15, 20, or 30 µM (panels 1–6, respectively). In a negative control, U2OS cells were transfected with pUC19, instead of pCBASce that expresses I-SceI (panel 7). U2OS cells transfected with pMX-GFP plasmid expressing GFP protein were used as a positive control (panel 8).

**Supplementary Figure 6.** The effect of D-I03 on the repair of the I-SceI-induced DSBs in U2OS cells carrying the HDR-GFP reporter (to measure gene conversion) was determined by flow cytometry. Green fluorescence (GRN-Hlog) was plotted against red fluorescence (RED-Hlog) for the sample of 10,000 cells. The GFP+ population is denoted by the elliptical M1 marker. Cells with I-SceI-induced DSBs were treated with D-I03 at 0, 5, 10, 15, 20, or 30 µM (panels 1–6, respectively). In a negative control, U2OS cells were transfected with pUC19, instead of pCBASce (panel 7). U2OS cells transfected with pMX-GFP plasmid expressing GFP protein were used as a positive control (panel 8).

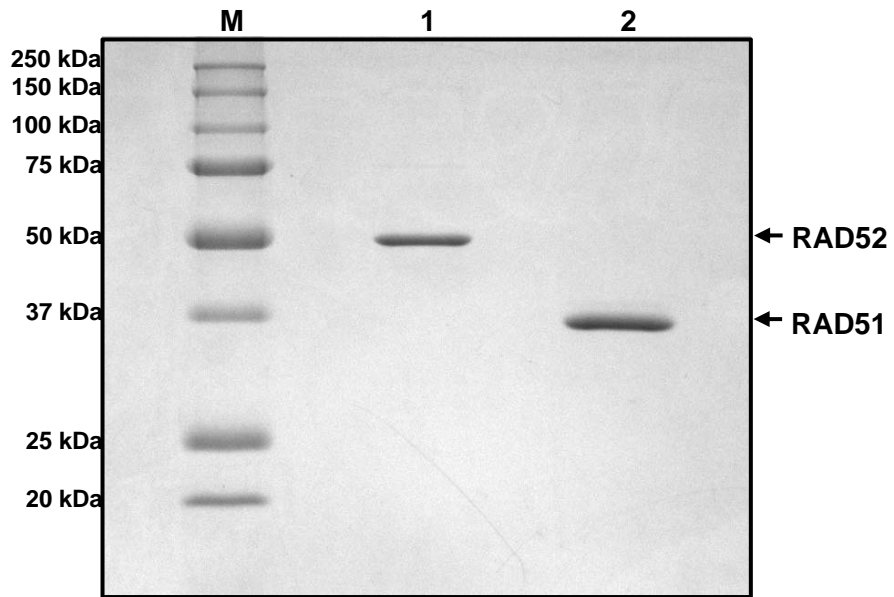

Supplementary Fig. 1

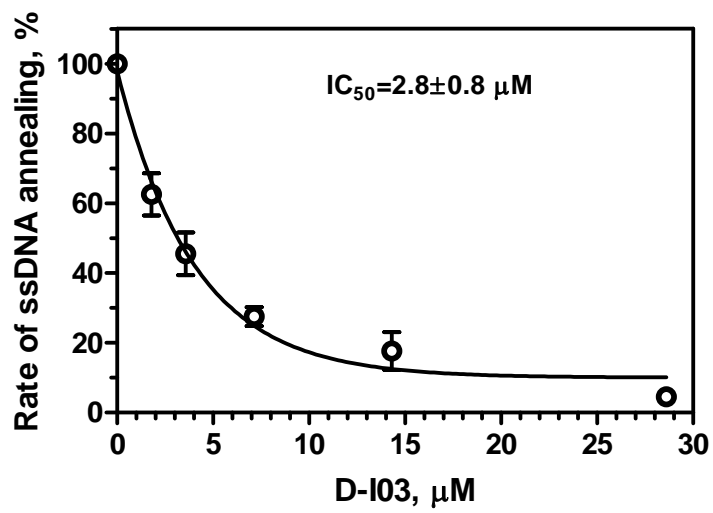

Supplementary Fig. 2

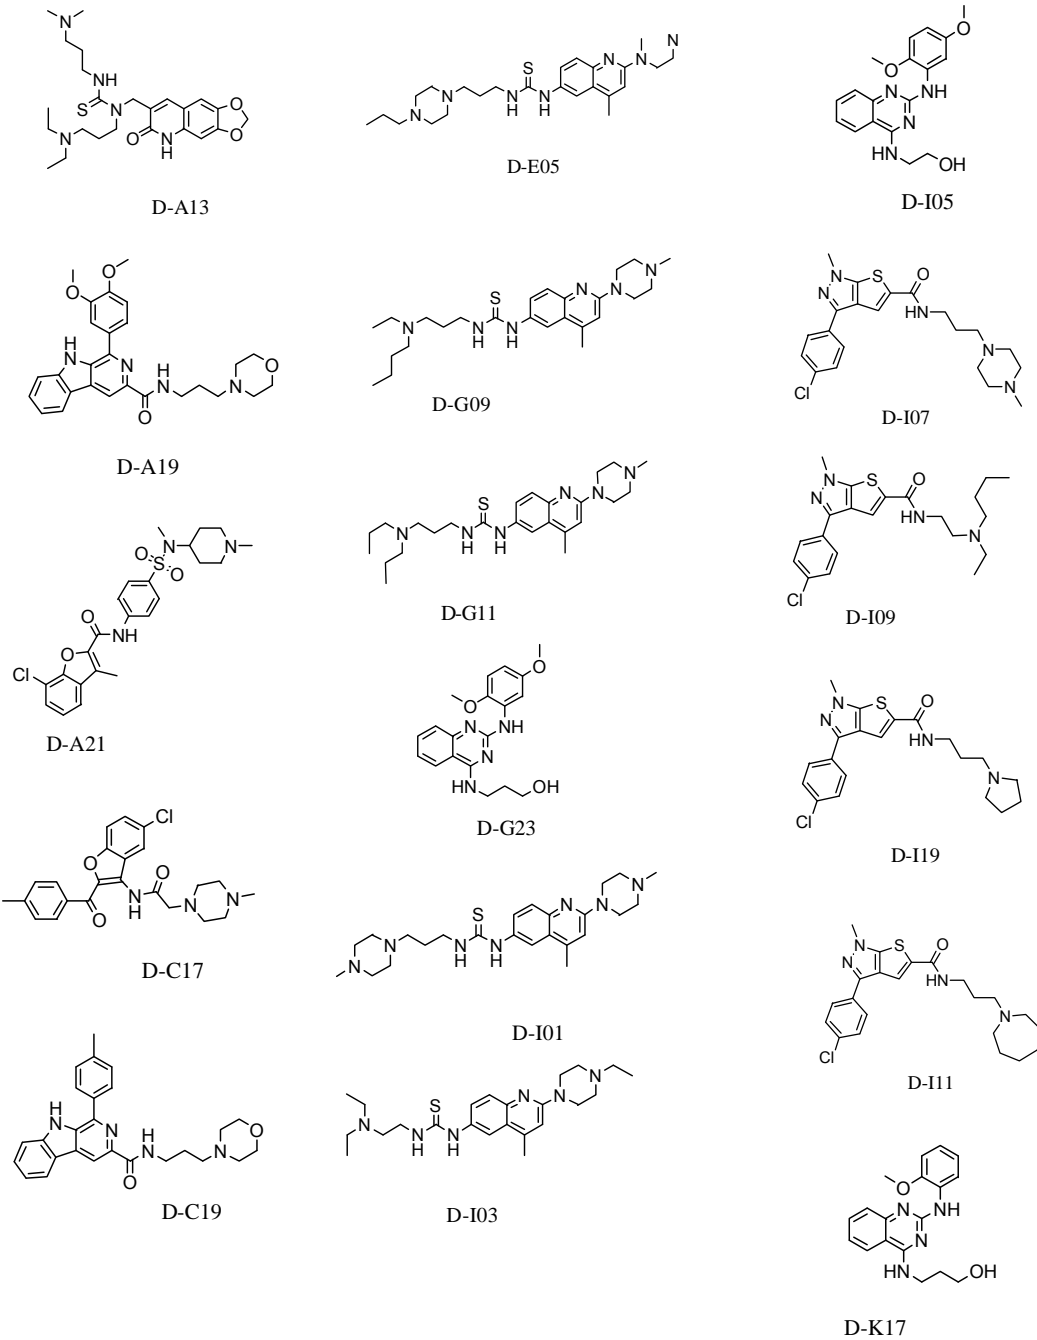

**Supplementary Fig. 3**

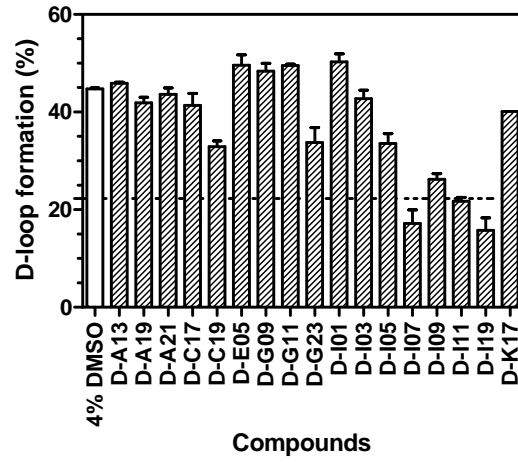

Supplementary Fig. 4

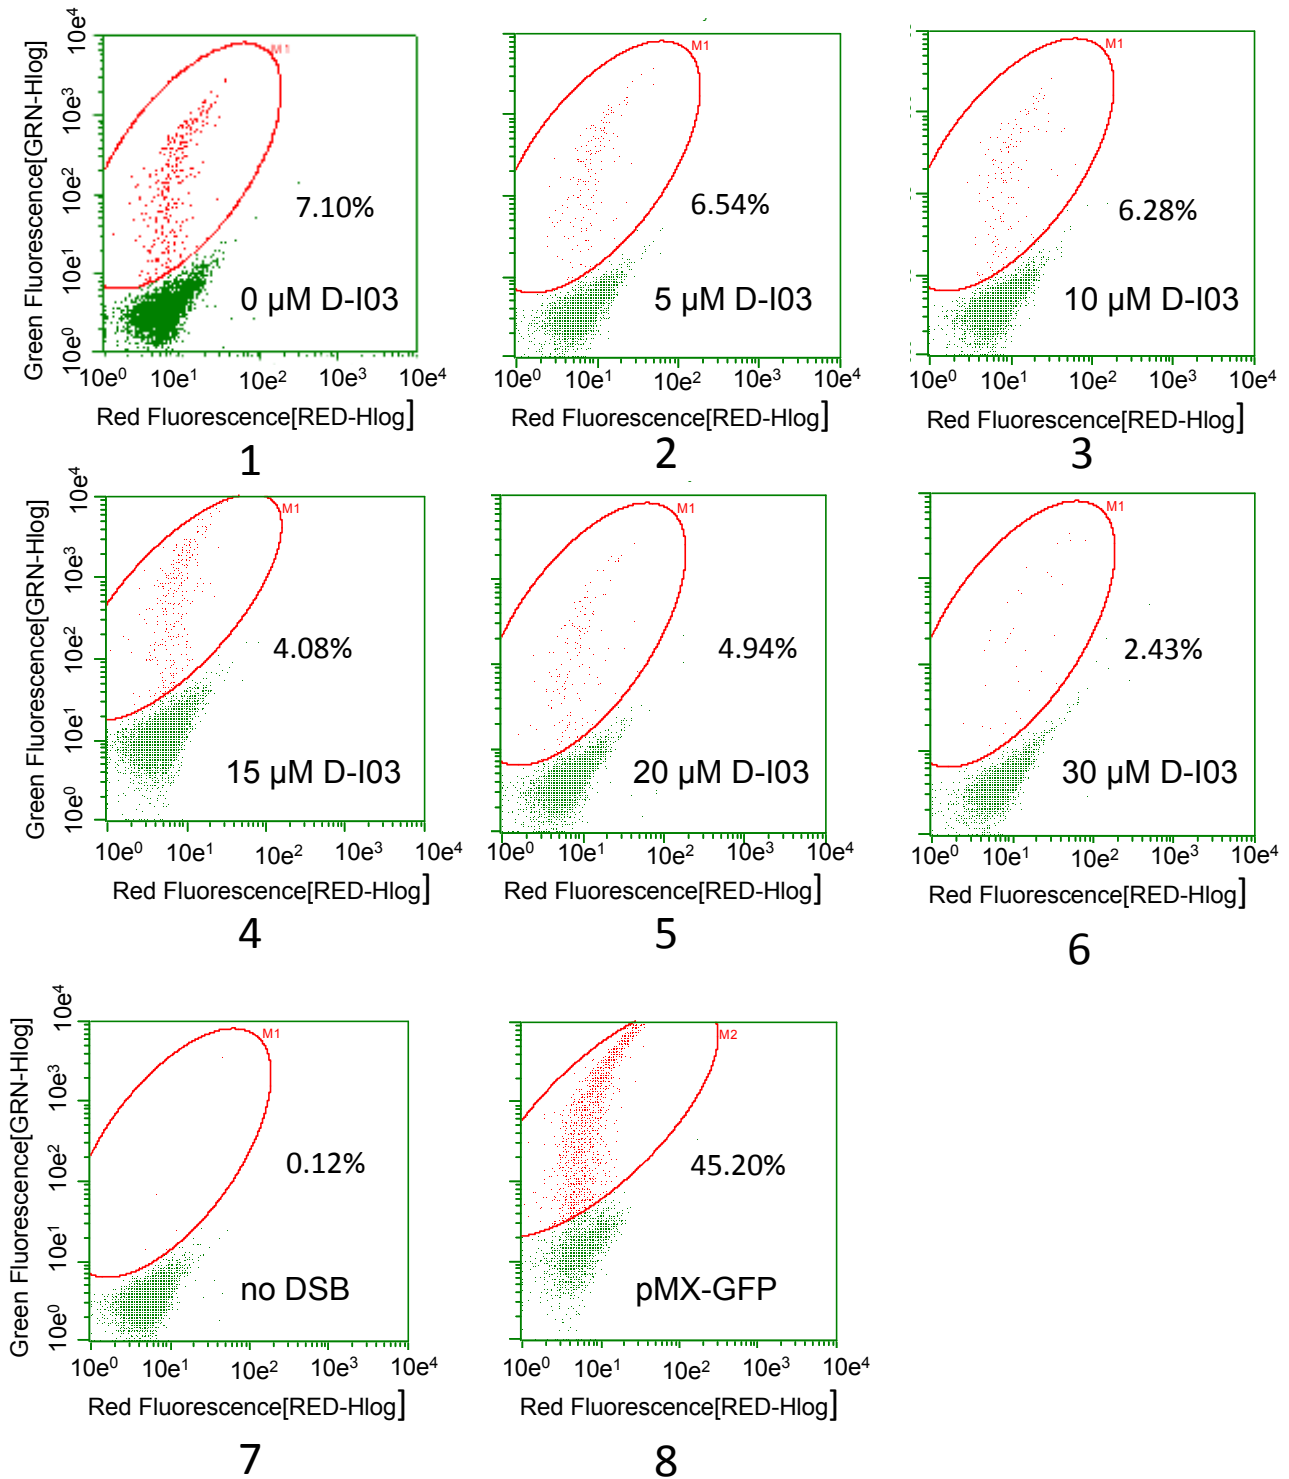

**Supplementary Fig. 5**

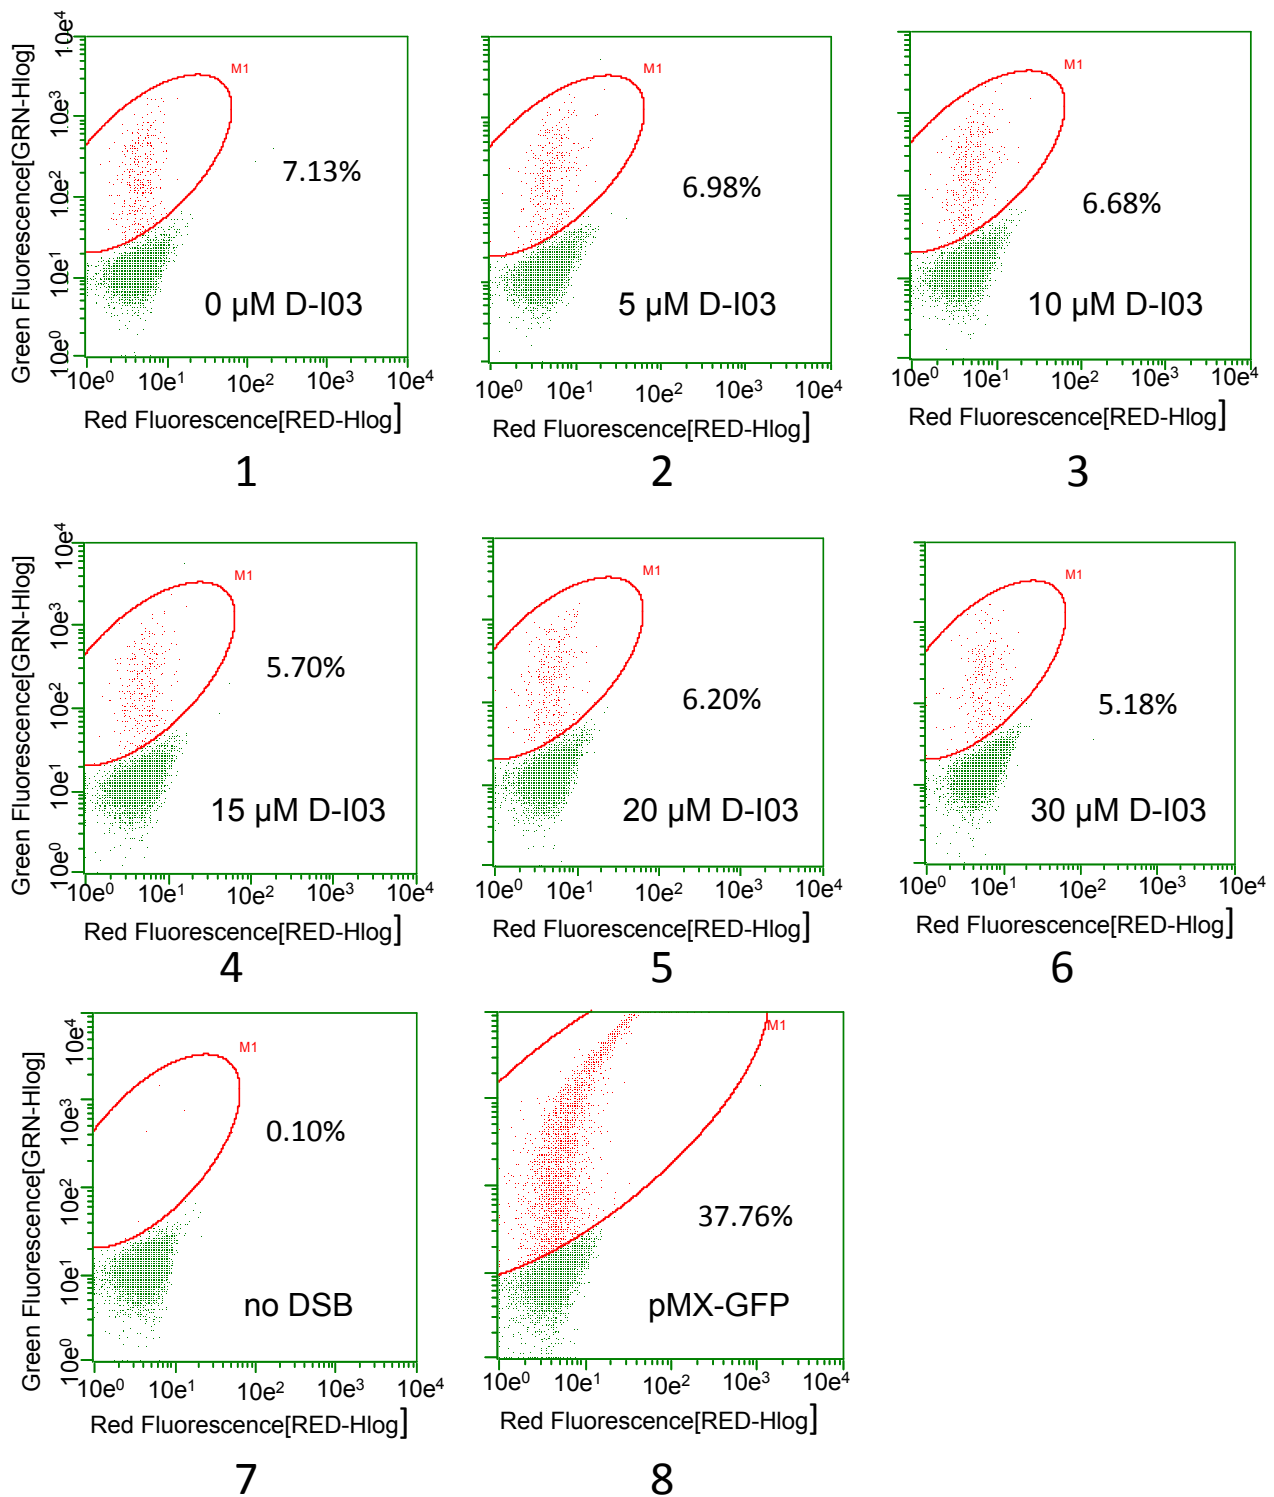

**Supplementary Fig. 6**



**Supplementary Table 1.** Sequences of the oligonucleotides

| N             | Length,<br>nt | Sequence (5'→3')                                                                                                |
|---------------|---------------|-----------------------------------------------------------------------------------------------------------------|
| 337-<br>FLU   | 60            | FLU-CACTGTGATGCACGATGATCGACGACAGTAGTCAGT<br>GCTGGGTCAACATCTGTATGCAGG                                            |
| 1337-<br>BHQ1 | 39            | AGCACTGACTACTGTCGTCGATCATCGTGCATCACAGTG-<br>BHQ1                                                                |
| 265-55        | 55            | ATACAGATGTTGACCCAGCACTGACTACTGTCGTC AATCAT<br>CGTGCATCACAGTG                                                    |
| 90            | 90            | CGGGTGTCGGGGCTGGCTTAACTATGCGGCATCAGAGCA<br>GATTGTACT GAG AGT GCA CCA TAT GCG GTG TGA AAT<br>ACC GCA CAG ATG CGT |

Note: “FLU” and “BHQ1” denote Fluorescein and Black Hole Quencher 1, respectively

**Supplementary Table 2. Effect of inhibitors on the ssDNA annealing and DNA pairing activities of RAD52 and on the DNA pairing activity of RAD51**

| Inhibitors | ssDNA annealing (Fluorescence quenching), IC <sub>50</sub> , μM | Inhibition of DNA pairing (D-loop formation), IC <sub>50</sub> , μM | Inhibition of RAD51 pairing (D-loop formation), %* |
|------------|-----------------------------------------------------------------|---------------------------------------------------------------------|----------------------------------------------------|
| D-A13      | 5.2                                                             | 13.6±0.64                                                           | 102.5±1.1                                          |
| D-A19      | 4.8                                                             | 7.2±0.28                                                            | 93.7±2.1                                           |
| D-A21      | 9.8                                                             | 16.2±0.42                                                           | 97.5±2.5                                           |
| D-C17      | 6.0                                                             | 17.6±0.78                                                           | 92.5±5.0                                           |
| D-C19      | 2.0                                                             | 4.3±0.35                                                            | 73.6± 2.2                                          |
| D-E05      | 1.7                                                             | 11.3±0.35                                                           | 110.9±4.3                                          |
| D-G09      | 2.0                                                             | 14.8±2.47                                                           | 108.2±3.1                                          |
| D-G11      | 6.0                                                             | 8.9±1.6                                                             | 110.7±0.2                                          |
| D-G23      | 5.6                                                             | 7.2±0.96                                                            | 75.6±7.1                                           |
| D-I01      | 3.6                                                             | 15.4±0.57                                                           | 112.5±4.2                                          |
| D-I03      | 5.0                                                             | 8.0±1.7                                                             | 95.5±4.3                                           |
| D-I05      | 4.3                                                             | 8.8±0.42                                                            | 75.1±4.8                                           |
| D-I07      | 2.0                                                             | 2.7±0.35                                                            | 38.4±6.4                                           |
| D-I09      | 6.8                                                             | 10.6±1.4                                                            | 58.6±2.9                                           |
| D-I11      | 4.1                                                             | 6.7±0.78                                                            | 48.6±2.0                                           |
| D-I19      | 3.5                                                             | 4.1±0.14                                                            | 35.3±5.8                                           |
| D-K17      | 2.9                                                             | 4.8±0.85                                                            | 89.7±0.4                                           |

Note:\* The effect of the inhibitors on RAD51 DNA pairing activity was measured at the concentrations that correspond their 10 x IC<sub>50</sub> for RAD52 pairing activity. 100% of the D-loop yield correspond to the extent of reaction in the presence of 4% DMSO; the actual extent of D-loops was 44.7±0.2 % under these conditions.

**Supplementary Table 3.** Calculated properties of D-I03 and D-G23 compounds\*

|                  | D-I03 | D-G23 |
|------------------|-------|-------|
| molecular weight | 429   | 354   |
| cLogP            | 3.65  | 3.29  |
| TPSA             | 47    | 89    |
| HBD              | 2     | 3     |
| HBA              | 5     | 7     |
| rotatable bonds  | 7     | 7     |

\* calculated using ADRIANA.code

TPSA = topological polar surface area

HBD = hydrogen bond donors

HBA = hydrogen bond acceptors

(<https://www.molecular->

[networks.com/files/docs/adrianacode/adrianacode\\_flyer.pdf](https://www.molecular-networks.com/files/docs/adrianacode/adrianacode_flyer.pdf))
